# Supplementary material for: Composite CdS/TiO2 Powders for the Selective Reduction of 4-Nitrobenzaldehyde by Visible Light: Relation between Preparation, Morphology and Photocatalytic Activity
Source: MDPI journal article supplement (doi:10.3390/catal13010074), 2022-12-30
Supplement: s1 [file s1]

## SUPPLEMENTARY INFORMATION

### Composite CdS/TiO<sub>2</sub> powders in the selective reduction of 4-nitrobenzaldehyde by visible light: relation between preparation, morphology and photocatalytic activity

M. Milani<sup>1</sup>, M. Mazzanti<sup>1</sup>, S. Caramori<sup>1</sup>, G. Di Carmine<sup>1</sup>, G. Magnacca<sup>2</sup>, A. Molinari<sup>1\*</sup>

<sup>1</sup> Dipartimento di Scienze Chimiche, Farmaceutiche ed Agrarie, Università di Ferrara, Via L. Borsari 46, 44121 Ferrara, Italy

<sup>2</sup> Dipartimento di Chimica, Università di Torino, Via P. Giuria 7, 10125 Torino, Italy

#### Table of Contents

**Figure S1.** A) Adsorption/desorption isotherms of CdS/TiO<sub>2</sub> samples; B) Pore size distribution curves; C) Pore area distribution curves. The logarithmic scale, where used, allows evidencing better the large pore region. The broken lines indicate the threshold between micro and meso/macropores.

**Figure S2.** Single photon time emission decay of powder CdS/TiO<sub>2</sub>-1

**Figure S3.** Single photon time emission decay of powder CdS/TiO<sub>2</sub>-2

**Figure S4.** Energy band gap of CdS/TiO<sub>2</sub> – 1/4 obtained using the baseline method (Ref. 33) coupled with that described by Tauc: for TiO<sub>2</sub> the fundamental fit is applied using the relation  $(Fh\nu)^\alpha = A \times (h\nu - E_g)$ , where F is the Kubelka-Munk coefficient,  $\alpha=1/2$  for an indirect band gap, A is a proportionality constant and  $h\nu$  is the photon energy; additionally, a linear fit used as an abscissa is applied for the slope below the fundamental absorption. An intersection of the two fitting lines gives the band energy estimation (red).

**Table S1.** Band gap values obtained from Figure S4.

**Figure S5.** Spectral changes obtained upon visible irradiation of deaerated suspensions of CdS/TiO<sub>2</sub> – 2 (3 g/L) in CH<sub>3</sub>CN/2-PrOH (4/1, 3mL) mixture containing NBA (1 x 10<sup>-4</sup> M).

**Figure S6.** Decrease of NBA concentration as a function of irradiation time for CdS/TiO<sub>2</sub> – 2 (squares), CdS (circles) and TiO<sub>2</sub> (triangles). The experimental conditions are the same of Figure 5. Values of CdS/TiO<sub>2</sub> – 2 (already present in Figure 5) are reported here for an easy comparison.

**Figure S7.** Kinetic rates calculation

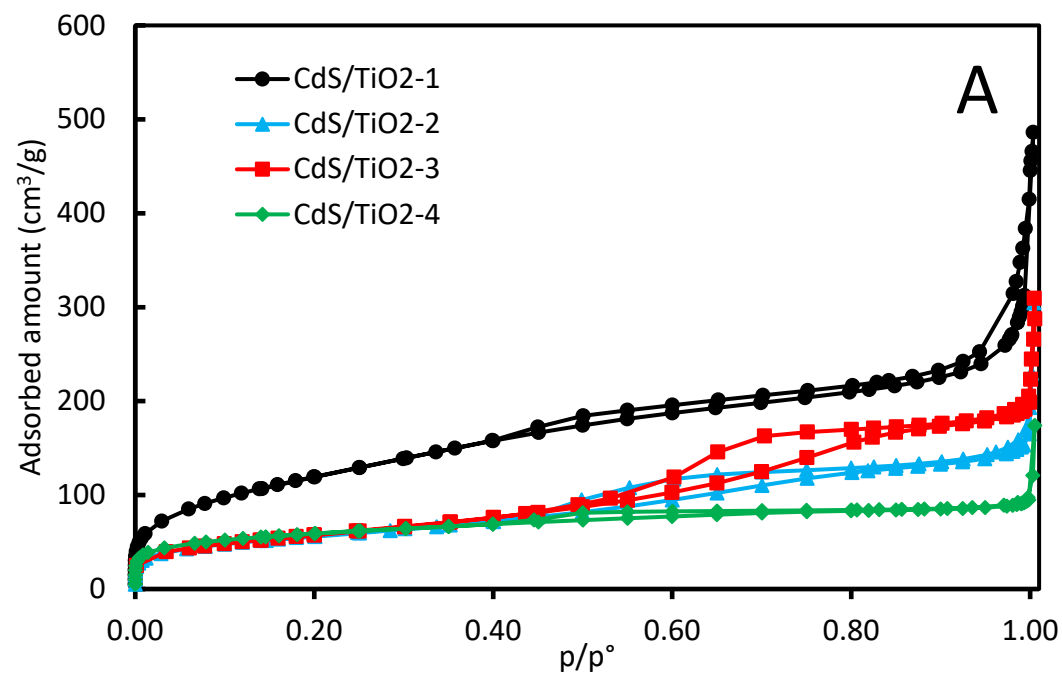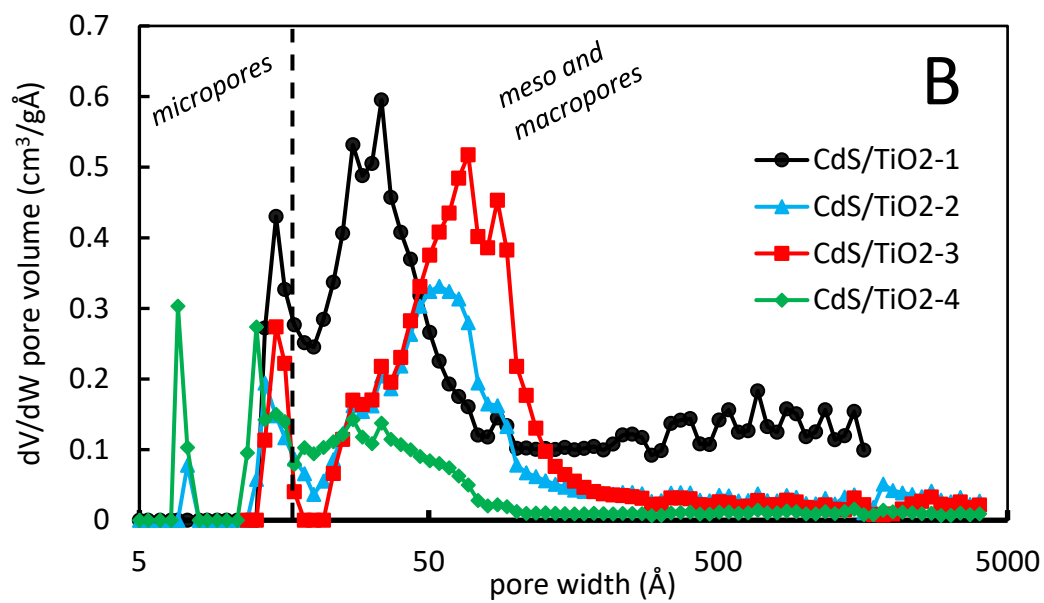

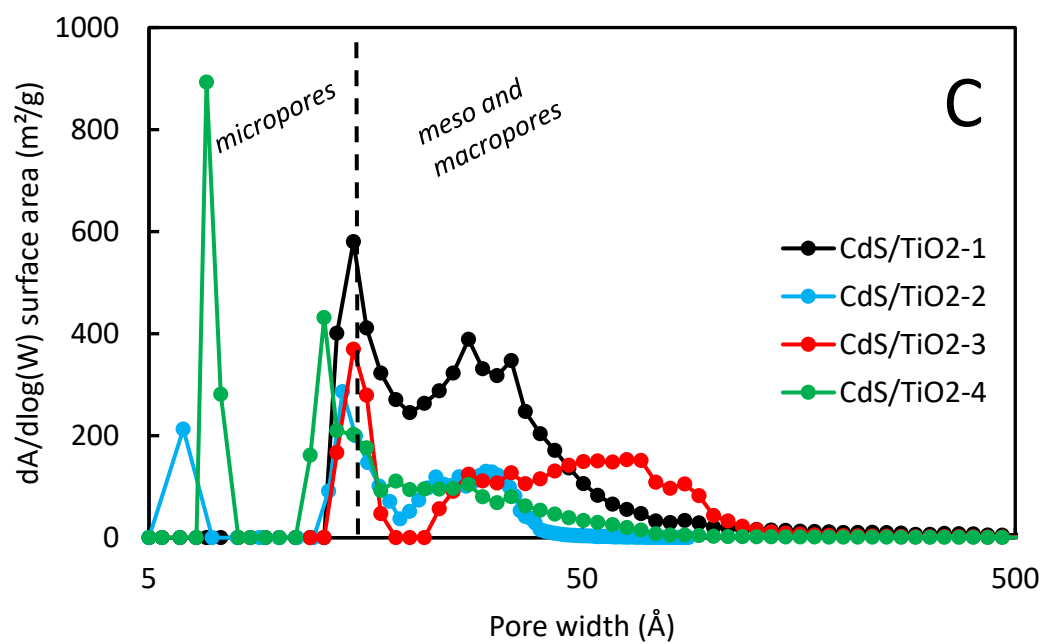

Figure S1

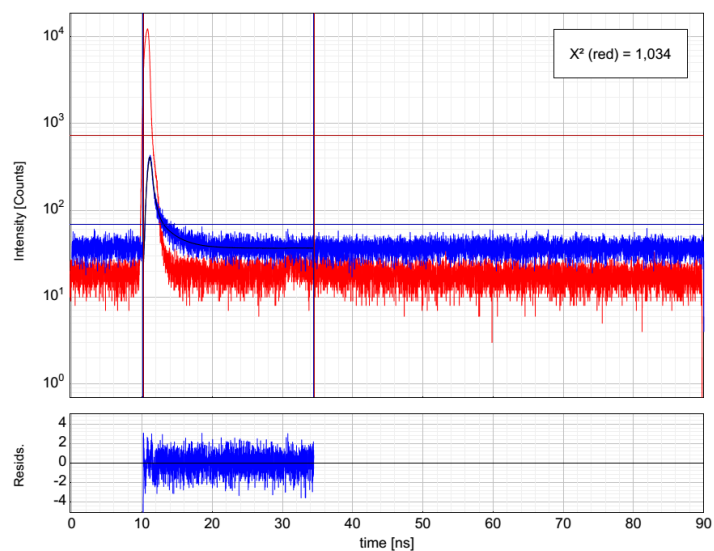

Fractional Intensities of the Positive Decay Components:

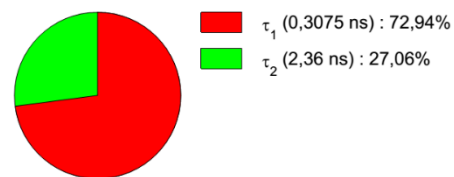

Fractional Amplitudes of the Positive Decay Components:

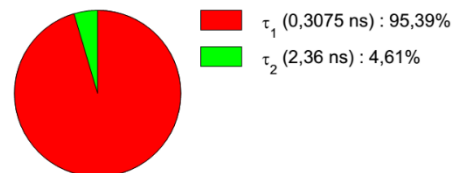

| Parameter         | Value    | Conf. Lower | Conf. Upper | Conf. Estimation |
|-------------------|----------|-------------|-------------|------------------|
| $A_1$ [Cnts]      | 1740     | -44         | +44         | Fitting          |
| $\tau_1$ [ns]     | 0,3075   | -0,0082     | +0,0082     | Fitting          |
| $A_2$ [Cnts]      | 84,2     | -7,5        | +7,5        | Fitting          |
| $\tau_2$ [ns]     | 2,36     | -0,23       | +0,23       | Fitting          |
| Bkgr. Dec [Cnts]  | 68,6     | -1,1        | +1,1        | Fitting          |
| Bkgr. IRF [Cnts]  | 731      | -24         | +24         | Fitting          |
| Shift IRF [ns]    | -0,25854 | -0,00091    | +0,00091    | Fitting          |
| $A_{Scat}$ [Cnts] | -53400   | -2700       | +2700       | Fitting          |

**Figure S2**

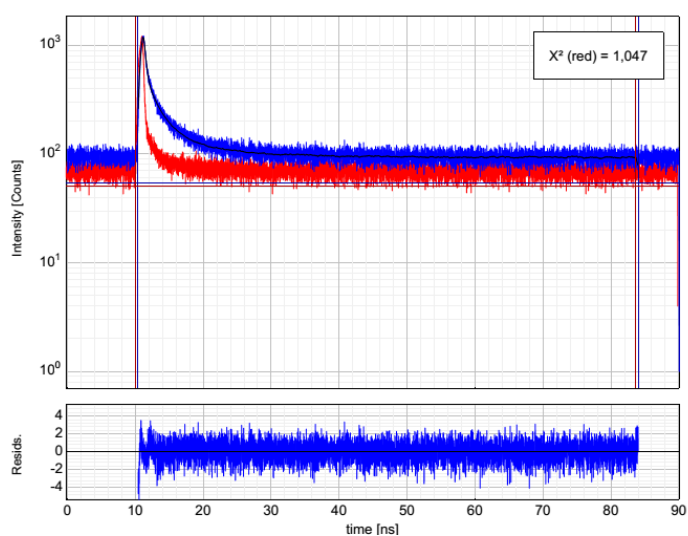

Fractional Intensities of the Positive Decay Components:

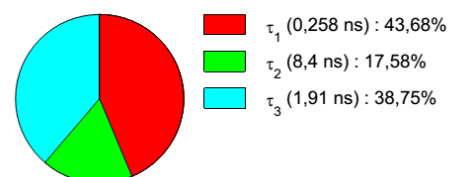

Fractional Amplitudes of the Positive Decay Components:

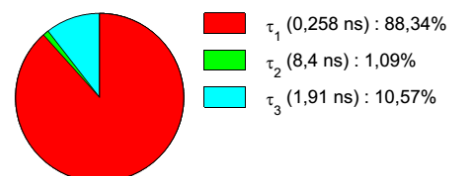

| Parameter         | Value  | Conf. Lower | Conf. Upper | Conf. Estimation |
|-------------------|--------|-------------|-------------|------------------|
| $A_1$ [Cnts]      | 26600  | -1300       | +1300       | Fitting          |
| $\tau_1$ [ns]     | 0,258  | -0,013      | +0,013      | Fitting          |
| $A_2$ [Cnts]      | 329    | -46         | +46         | Fitting          |
| $\tau_2$ [ns]     | 8,4    | -1,2        | +1,2        | Fitting          |
| $A_3$ [Cnts]      | 3190   | -190        | +190        | Fitting          |
| $\tau_3$ [ns]     | 1,91   | -0,11       | +0,11       | Fitting          |
| Bkgr. Dec [Cnts]  | 54,3   | -1,7        | +1,7        | Fitting          |
| Bkgr. IRF [Cnts]  | 50,93  | -0,81       | +0,81       | Fitting          |
| Shift IRF [ns]    | -0,190 | -0,015      | +0,015      | Fitting          |
| $A_{Scat}$ [Cnts] | -66000 | -73000      | +73000      | Fitting          |

**Figure S3.**

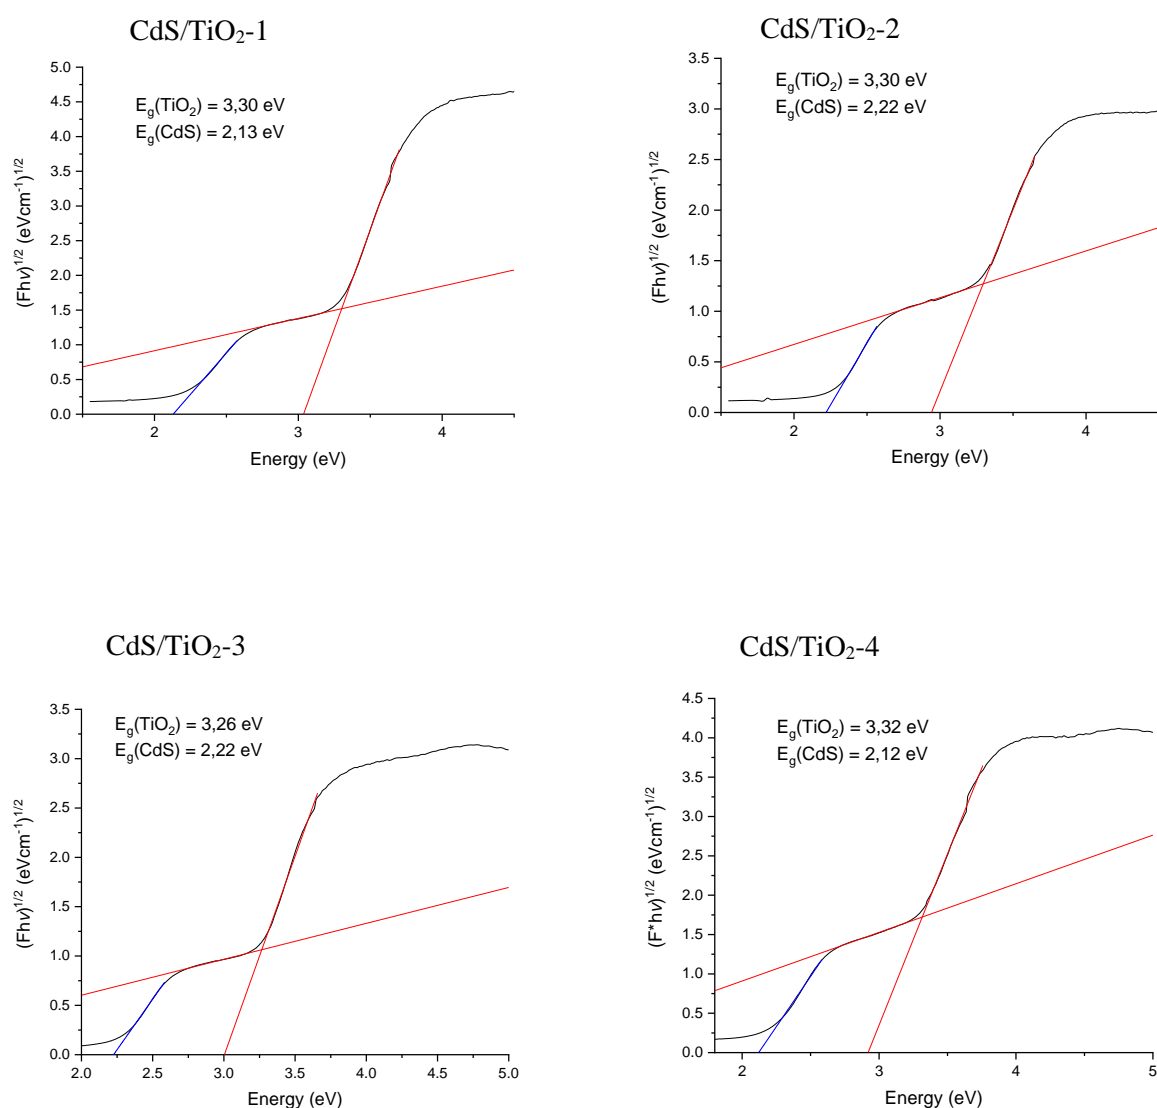

**Figure S4.**

**Table S1.** Band gap values obtained from Figure S4

| Sample                   | CdS (eV) | TiO <sub>2</sub> (eV) |
|--------------------------|----------|-----------------------|
| CdS/TiO <sub>2</sub> – 1 | 2.13     | 3.30                  |
| CdS/TiO <sub>2</sub> – 2 | 2.22     | 3.30                  |
| CdS/TiO <sub>2</sub> – 3 | 2.22     | 3.26                  |
| CdS/TiO <sub>2</sub> – 4 | 2.12     | 3.32                  |

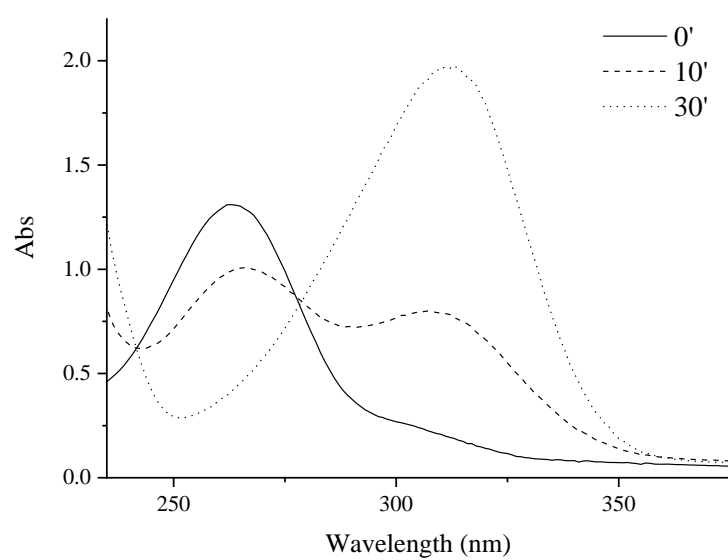

**Figure S5.**

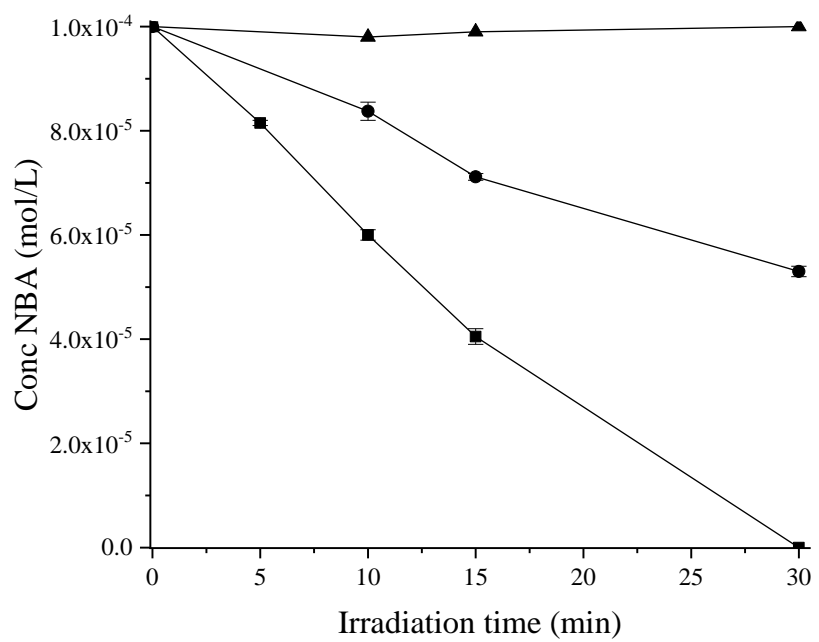

**Figure S6**



CdS/TiO<sub>2</sub>-2

| <b>[NBA]<sub>t</sub></b> | <b>([NBA]<sub>0</sub>-[NBA]<sub>t</sub>)</b> | <b>-(t<sub>0</sub>-t)</b> | <b>ν</b> |
|--------------------------|----------------------------------------------|---------------------------|----------|
| 1,0E-04                  | 0                                            | 0                         | 0        |
| 8,0E-05                  | 1,9E-05                                      | 5                         | 3,9E-06  |
| 5,9E-05                  | 4,1E-05                                      | 10                        | 4,1E-06  |
| 4,0E-05                  | 5,9E-05                                      | 15                        | 3,9E-06  |
| 1,0E-06                  | 9,9E-05                                      | 30                        | 3,3E-06  |

CdS/TiO<sub>2</sub>-3

| <b>[NBA]<sub>t</sub></b> | <b>([NBA]<sub>0</sub>-[NBA]<sub>t</sub>)</b> | <b>-(t<sub>0</sub>-t)</b> | <b>ν</b> |
|--------------------------|----------------------------------------------|---------------------------|----------|
| 1,0E-04                  | 0                                            | 0                         | 0        |
| 9,3E-05                  | 6,1E-06                                      | 5                         | 1,2E-06  |
| 7,3E-05                  | 2,7E-05                                      | 10                        | 2,7E-06  |
| 5,3E-05                  | 4,7E-05                                      | 15                        | 3,1E-06  |
| 8,2E-06                  | 9,2E-05                                      | 30                        | 3,0E-06  |

CdS/TiO<sub>2</sub>-4

| <b>[NBA]<sub>t</sub></b> | <b>([NBA]<sub>0</sub>-[NBA]<sub>t</sub>)</b> | <b>-(t<sub>0</sub>-t)</b> | <b>ν</b> |
|--------------------------|----------------------------------------------|---------------------------|----------|
| 1,0E-04                  | 0                                            | 0                         | 0        |
| 8,0E-05                  | 1,9E-05                                      | 15                        | 1,3E-06  |
| 5,0E-05                  | 5,0E-05                                      | 30                        | 1,7E-06  |
| 2,4E-05                  | 7,5E-05                                      | 45                        | 1,7E-06  |
| 0                        | 1,0E-04                                      | 60                        | 1,7E-06  |

CdS/TiO<sub>2</sub>-1

| <b>[NBA]<sub>t</sub></b> | <b>([NBA]<sub>0</sub>-[NBA]<sub>t</sub>)</b> | <b>-(t<sub>0</sub>-t)</b> | <b>ν</b> |
|--------------------------|----------------------------------------------|---------------------------|----------|
| 1,0E-04                  | 0                                            | 0                         | 0        |
| 8,0E-05                  | 2,0E-05                                      | 30                        | 6,7E-07  |
| 2,2E-05                  | 7,7E-05                                      | 60                        | 1,3E-06  |
| 6,7E-06                  | 9,3E-05                                      | 120                       | 7,8E-07  |
| 5,2E-07                  | 9,9E-05                                      | 150                       | 6,6E-07  |

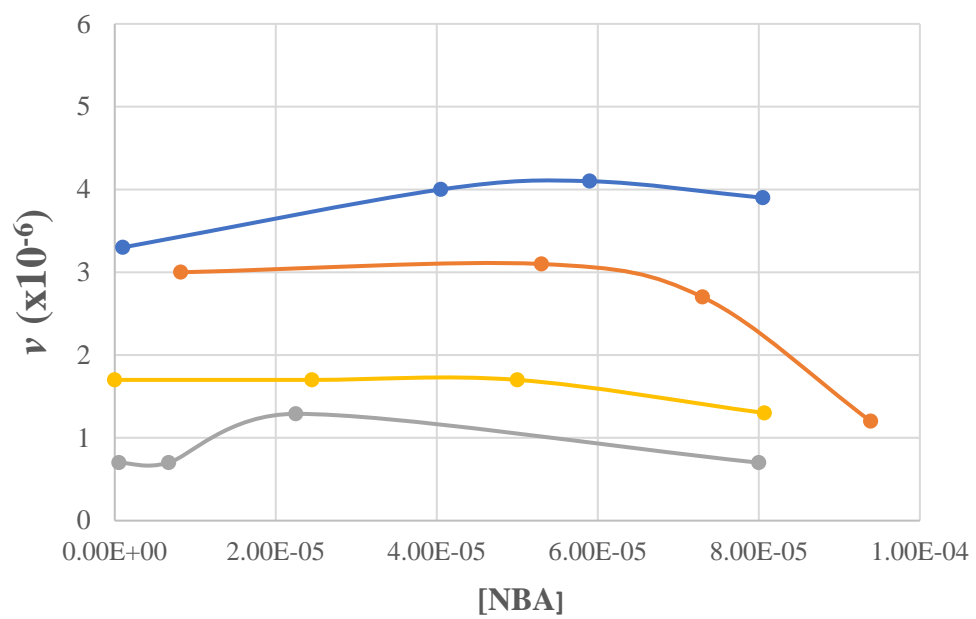

**Figure S7.**
